# Supplementary material for: Visual Thinking Strategies in medical education: a systematic review
Source: PubMed Central journal article supplement (PMC10375761; doi:10.1186/s12909-023-04470-3), 2023-07-27
Supplement: 12909_2023_4470_MOESM1_ESM.pdf [file 12909_2023_4470_MOESM1_ESM.pdf]

## Additional file 1. Search strategies for electronic databases.

### a) PubMed Search Strategy

|     |                                                                                                                      |
|-----|----------------------------------------------------------------------------------------------------------------------|
| #1  | education, medical[MeSH Terms]                                                                                       |
| #2  | schools, medical[MeSH Terms]                                                                                         |
| #3  | academic, medical centers[MeSH Terms]                                                                                |
| #4  | preceptorship [MeSH Terms]                                                                                           |
| #5  | medical curricul*[Title/Abstract]                                                                                    |
| #6  | students, medical[MeSH Terms]                                                                                        |
| #7  | medical education[Title/Abstract]                                                                                    |
| #8  | medical student[Title/Abstract]                                                                                      |
| #9  | medical school[Title/Abstract]                                                                                       |
| #10 | medicine[Title/Abstract]                                                                                             |
| #11 | medicine[MeSH Terms]                                                                                                 |
| #12 | clinical clerkship[MeSH Terms]                                                                                       |
| #13 | education, medical, graduate[MeSH Terms]                                                                             |
| #14 | education, medical, undergraduate[MeSH Terms]                                                                        |
| #15 | undergraduate med*[Title/Abstract]                                                                                   |
| #16 | undergraduate stud*[Title/Abstract]                                                                                  |
| #17 | postgraduate med*[Title/Abstract]                                                                                    |
| #18 | postgraduate stud*[Title/Abstract]                                                                                   |
| #19 | #1 OR #2 OR #3 OR #4 OR #5 OR #6 OR #7 OR #8 OR #9 OR<br>#10 OR #11 OR #12 OR #13 OR #14 OR #15 OR #16 OR #17 OR #18 |
| #20 | visual thinking [Title/Abstract]                                                                                     |
| #21 | visual skill                                                                                                         |
| #22 | visual literacy[Title/Abstract]                                                                                      |
| #23 | visual art*[Title/Abstract]                                                                                          |
| #24 | visual diagnos*[Title/Abstract]                                                                                      |
| #25 | #20 OR #21 OR #22 OR #23 OR #24                                                                                      |
| #26 | #19 AND #25                                                                                                          |

Filter: 1991-

**b) Cochrane Central Register of Controlled Trials (CENTRAL) Search Strategy**

|     |                                                                                                                   |
|-----|-------------------------------------------------------------------------------------------------------------------|
| #1  | MeSH descriptor: [Education, Medical] explode all trees                                                           |
| #2  | MeSH descriptor: [Schools, Medical] explode all trees                                                             |
| #3  | MeSH descriptor: [Academic Medical Centers] explode all trees                                                     |
| #4  | MeSH descriptor: [Preceptorship] explode all trees                                                                |
| #5  | (medical curricul*):ti,ab,kw                                                                                      |
| #6  | MeSH descriptor: [Students, Medical] explode all trees                                                            |
| #7  | (medical education):ti,ab,kw                                                                                      |
| #8  | (medical student):ti,ab,kw                                                                                        |
| #9  | (medical school):ti,ab,kw                                                                                         |
| #10 | (medicine):ti,ab,kw                                                                                               |
| #11 | MeSH descriptor: [Medicine] explode all trees                                                                     |
| #12 | MeSH descriptor: [Clinical Clerkship] explode all trees                                                           |
| #13 | MeSH descriptor: [Education, Medical, Graduate] explode all trees                                                 |
| #14 | MeSH descriptor: [Education, Medical, Undergraduate] explode all trees                                            |
| #15 | (undergraduate med*):ti,ab,kw                                                                                     |
| #16 | (undergraduate stud*):ti,ab,kw                                                                                    |
| #17 | (postgraduate med*):ti,ab,kw                                                                                      |
| #18 | (postgraduate stud*):ti,ab,kw                                                                                     |
| #19 | #1 OR #2 OR #3 OR #4 OR #5 OR #6 OR #7 OR #8 OR #9 OR #10 OR #11 OR #12 OR #13 OR #14 OR #15 OR #16 OR #17 OR #18 |
| #20 | visual skill                                                                                                      |
| #21 | (visual thinking):ti,ab,kw                                                                                        |
| #22 | (visual literacy):ti,ab,kw                                                                                        |
| #23 | (visual art*):ti,ab,kw                                                                                            |
| #24 | (visual diagnos*):ti,ab,kw                                                                                        |
| #25 | #20 OR #21 OR #22 OR #23 OR #24                                                                                   |
| #26 | #19 AND #25 with Publication Year from 1991 to 2022, in Trials                                                    |

### c) PsycInfo Search Strategy

|     |                                                                                                                                                                     |
|-----|---------------------------------------------------------------------------------------------------------------------------------------------------------------------|
| S1  | MA medical education or medical school or medical students or medical curriculum or medical student education or clinical education : Search modes - Boolean/Phrase |
| S2  | MA academic medical center : Search modes - Boolean/Phrase                                                                                                          |
| S3  | MA preceptorship or clinical clerkship : Search modes - Boolean/Phrase                                                                                              |
| S4  | MA medicine: Search modes - Boolean/Phrase                                                                                                                          |
| S5  | AB medical curricul*: Search modes - Boolean/Phrase                                                                                                                 |
| S6  | AB medical education or medical school or medical students or medical curriculum or medical student education or clinical education: Search modes - Boolean/Phrase  |
| S7  | AB medicine: Search modes - Boolean/Phrase                                                                                                                          |
| S8  | MA graduate medical education: Search modes - Boolean/Phrase                                                                                                        |
| S9  | MA undergraduate medical education: Search modes - Boolean/Phrase                                                                                                   |
| S10 | AB undergraduate med* or undergraduate stud*: Search modes - Boolean/Phrase                                                                                         |
| S11 | AB postgraduate med* or postgraduate stud*: Search modes - Boolean/Phrase                                                                                           |
| S12 | S1 OR S2 OR S3 OR S4 OR S5 OR S6 OR S7 OR S8 OR S9 OR S10 OR S11: Search modes - Boolean/Phrase                                                                     |
| S13 | TX visual skill: Search modes - Boolean/Phrase                                                                                                                      |
| S14 | AB visual thinking: Search modes - Boolean/Phrase                                                                                                                   |
| S15 | AB visual literacy: Search modes - Boolean/Phrase                                                                                                                   |
| S16 | AB visual art*: Search modes - Boolean/Phrase                                                                                                                       |
| S17 | AB visual diagnos*: Search modes - Boolean/Phrase                                                                                                                   |
| S18 | S13 OR S14 OR S15 OR S16 OR S17 : Search modes - Boolean/Phrase                                                                                                     |
| S19 | S12 AND S18: Search modes - Boolean/Phrase                                                                                                                          |
| S20 | PY 1991-: Search modes - Boolean/Phrase                                                                                                                             |
| S21 | S19 AND S20: Search modes - Boolean/Phrase                                                                                                                          |
