# Supplementary material for: Visual Thinking Strategies in medical education: a systematic review
Source: PubMed Central journal article supplement (PMC10375761; doi:10.1186/s12909-023-04470-3), 2023-07-27
Supplement: 12909_2023_4470_MOESM2_ESM.pdf [file 12909_2023_4470_MOESM2_ESM.pdf]

## Additional file 2. Risk of bias assessment- JBI Critical Appraisal Checklists

| <b>Checklist for Quasi-Experimental Studies</b>                                                                                            | Bentwich & Gilbey, 2017 (31)            | Klugman et al., 2011(23)                | Jasani & Saks, 2013 (24)                | Huang et al., 2016 (25)                  | Agarwal et al., 2020 (26)               | Cole et al., 2020 <sup>a</sup> (27) | Ho Tiu et al., 2019 (32) |
|--------------------------------------------------------------------------------------------------------------------------------------------|-----------------------------------------|-----------------------------------------|-----------------------------------------|------------------------------------------|-----------------------------------------|-------------------------------------|--------------------------|
| 1.Is it clear in the study what is the 'cause' and what is the 'effect' (i.e. there is no confusion about which variable comes first)?     | Yes                                     | Yes                                     | Yes                                     | Yes                                      | Yes                                     | -                                   | Yes                      |
| 2.Were the participants included in any comparison similar?                                                                                | Yes                                     | Yes                                     | Yes                                     | Yes                                      | No                                      | -                                   | Yes                      |
| 3.Were the participants included in any comparisons receiving similar treatment/care, other than the exposure or intervention of interest? | Yes                                     | No                                      | Yes                                     | No                                       | No                                      | -                                   | No                       |
| 4.Was there a control group?                                                                                                               | No                                      | No                                      | No                                      | No                                       | Yes                                     | -                                   | No                       |
| 5.Were there multiple measurements of the outcome both pre and post the intervention/exposure?                                             | No (pre- and post-, single measurement) | No (pre- and post-, single measurement) | No (pre- and post-, single measurement) | No (pre- and post-, single measurement ) | No (pre- and post-, single measurement) | -                                   | No                       |
| 6.Was follow up complete and if not, were differences between groups in terms of their follow up adequately described and analyzed?        | No                                      | Unclear                                 | Unclear                                 | No                                       | No                                      | -                                   | Yes                      |
| 7.Were the outcomes of participants included in any comparisons measured in the same way?                                                  | Yes                                     | Yes                                     | Yes                                     | Yes                                      | Yes                                     | -                                   | Yes                      |
| 8.Were outcomes measured in a reliable way?                                                                                                | Yes                                     | Yes                                     | Yes                                     | Yes                                      | Yes                                     | -                                   | Yes                      |
| 9.Was appropriate statistical analysis used?                                                                                               | Yes                                     | Yes                                     | Yes                                     | Yes                                      | Yes                                     | -                                   | Yes                      |

<sup>a</sup> only available as a conference abstract

| <b>Checklist for Qualitative Research</b>                                                                                                          | Visscher et al.,<br>2019 (29) | Allison et al.,<br>2017 (30) | Srivastava et al.,<br>2022 (28) |
|----------------------------------------------------------------------------------------------------------------------------------------------------|-------------------------------|------------------------------|---------------------------------|
| 1. Is there congruity between the stated philosophical perspective and the research methodology?                                                   | Yes                           | Unclear                      | Unclear                         |
| 2. Is there congruity between the research methodology and the research question or objectives?                                                    | Yes                           | Yes                          | Yes                             |
| 3. Is there congruity between the research methodology and the methods used to collect data?                                                       | Yes                           | Yes                          | Yes                             |
| 4. Is there congruity between the research methodology and the representation and analysis of data?                                                | Yes                           | Yes                          | Yes                             |
| 5. Is there congruity between the research methodology and the interpretation of results?                                                          | Yes                           | Yes                          | Yes                             |
| 6. Is there a statement locating the researcher culturally or theoretically?                                                                       | No                            | Yes                          | No                              |
| 7. Is the influence of the researcher on the research, and vice-versa, addressed?                                                                  | No                            | No                           | No                              |
| 8. Are participants, and their voices, adequately represented?                                                                                     | Yes                           | Yes                          | Yes                             |
| 9. Is the research ethical according to current criteria or, for recent studies, and is there evidence of ethical approval by an appropriate body? | Yes                           | No                           | Yes                             |
| 10. Do the conclusions drawn in the research report flow from the analysis, or interpretation, of the data?                                        | Yes                           | Yes                          | Yes                             |

| <b>Checklist for Randomized Controlled Trials</b>                                                                                                                                         | Naghshineh et al., 2008<br>(22) |
|-------------------------------------------------------------------------------------------------------------------------------------------------------------------------------------------|---------------------------------|
| 1. Was true randomization used for assignment of participants to treatment groups?                                                                                                        | No                              |
| 2. Was allocation to treatment groups concealed?                                                                                                                                          | No                              |
| 3. Were treatment groups similar at the baseline?                                                                                                                                         | Yes                             |
| 4. Were participants blind to treatment assignment?                                                                                                                                       | No                              |
| 5. Were those delivering treatment blind to treatment assignment?                                                                                                                         | No                              |
| 6. Were outcomes assessors blind to treatment assignment?                                                                                                                                 | Yes                             |
| 7. Were treatment groups treated identically other than the intervention of interest?                                                                                                     | Yes                             |
| 8. Was follow up complete and if not, were differences between groups in terms of their follow up adequately described and analyzed?                                                      | No                              |
| 9. Were participants analyzed in the groups to which they were randomized?                                                                                                                | Yes                             |
| 10. Were outcomes measured in the same way for treatment groups?                                                                                                                          | Yes                             |
| 11. Were outcomes measured in a reliable way?                                                                                                                                             | Yes                             |
| 12. Was appropriate statistical analysis used?                                                                                                                                            | Yes                             |
| 13. Was the trial design appropriate, and any deviations from the standard RCT design (individual randomization, parallel groups) accounted for in the conduct and analysis of the trial? | Yes                             |
